# Supplementary material
Source: Frontiers journal article supplement (https://www.frontiersin.org/articles/530890)
Supplement: Data_Sheet_1.DOCX [file Data_Sheet_1.DOCX]

**Supplementary Information**

All supplementary information as noted in the article may be found below, with supporting text to describe and clarify the results.

**Predator-Prey matrix**

Since foraging ecology studies for marine biota were rare, we assumed the predator-prey matrix for most functional groups to remain the same as Corrales et al., (2017), with modifications only on those functional groups added for this study’s questions (± 5% in order to balance the model and compute Ecotrophic Efficiency (EE), supplementary materials B). Only one group’s biomass, Goatfishes, was increased by 0.0006 t km-2, to balance the model. The species-specific fisheries data from the Ashdod trawl surveys (collated from 2008-2010) was compiled and rearranged to fit their model’s functional groups, and thus the diet composition remains the same. The reared fish diet was entirely composed of pellets. The sharks FG mainly forage caged fish discards and medium pelagic fish; their P/B and Q/B were taken from Corrales et al., 2017. In the landing input, raw data compiled from surveys along the Israeli coastline (from small, semi-industrial trawls, artisanal boats, purse-seines, trammel-net and longline fisheries) were collated and grouped according to functional group (Goren, 2013 and Edelist et al., 2013). Detritus import, classed by functional group, was taken from Coralles et al. (2017a).

1. **Diet composition entered Ecopath model. Blank cells indicate no diet composition value entered. Cells outlined are entered values less than <0.0001**

**Fisheries and Landings estimates**

1. **Landings estimates**

|  | Group name | GiliOcean | Commercial Trawler | Total |
| --- | --- | --- | --- | --- |
| 1 | Phytoplankton* | 0 | 0 | 0.000 |
| 2 | Benthic primary producers | 0 | 0 | 0.000 |
| 3 | Micro/Mesozooplankton * | 0 | 0 | 0.000 |
| 4 | Macrozooplankton* | 0 | 0 | 0.000 |
| 5 | Gelatinous plankton* | 0 | 0 | 0.000 |
| 6 | Polychaetes | 0 | 0 | 0.000 |
| 7 | Suprabenthos | 0 | 0 | 0.000 |
| 8 | Shrimps | 0 | 4.70565E-05 | 0.000 |
| 9 | Crabs | 0 | 4.81451E-06 | 0.000 |
| 10 | Benthic invertebrates | 0 | 3.8E-08 | 0.000 |
| 11 | Benthic cephalopods | 0 | 0.000163747 | 0.000 |
| 12 | Benthopelagic cephalopods* | 0 | 0.124 | 0.124 |
| 13 | Mullets | 0 | 3E-05 | 0.000 |
| 14 | Demersal fishes | 0 | 0.000803875 | 0.001 |
| 15 | Goatfishes | 0 | 4E-05 | 0.000 |
| 16 | Herbivorous fish | 0 | 4.2903E-05 | 0.000 |
| 17 | Rocky fish | 0 | 3E-05 | 0.000 |
| 18 | Flatfishes | 0 | 2E-05 | 0.000 |
| 19 | Lizardfish | 0 | 0.000177977 | 0.000 |
| 20 | Benthopelagic fishes* | 0 | 0.000432756 | 0.000 |
| 21 | Mesopelagic fishes* | 0 | 0.033 | 0.033 |
| 22 | Sharks | 0 | 2.44683E-06 | 0.000 |
| 23 | Rays and skates | 0 | 7.35946E-05 | 0.000 |
| 24 | Small pelagic fishes* | 0 | 0.001040745 | 0.001 |
| 25 | Mackerel* | 0 | 0 | 0.000 |
| 26 | Medium pelagic fishes | 0 | 0.000199294 | 0.000 |
| 27 | Large pelagic fishes* | 0 | 0.000475075 | 0.000 |
| 28 | Turtles | 0 | 0 | 0.000 |
| 29 | Dolphins* | 0 | 0 | 0.000 |
| 30 | Cages | 20 | 0 | 20.000 |
| 31 | Bacteria | 0 | 0 | 0.000 |
| 32 | Detritus | 0 | 0 | 0.000 |
| 33 | Discards | 0 | 0 | 0.000 |
| 34 | Pellets | 0 | 0 | 0.000 |
| 35 | Sum | 20 | 0.1605843 | 20.161 |

**Sources of Basic Input Biomass Estimates**

The wet weight biomass estimates were derived from four main sources (detailed description of the inputs available in Appendix IV). Unlike the 2017 Israeli model which considered the entire Exclusive Economic Zone (EEZ; Corrales et al., 2017a, b), there was no distinction between native and alien fish and invertebrate groups. Phytoplankton estimates were derived *in-situ* at the cage site in 2015 (Grossowicz, 2016), with benthic primary production taken from Corrales et al. (2017). For all benthic functional groups, mesopelagic fish, demersal sharks, turtles, dolphins, detritus and discards, the biomass (t km-2 yr-1), P/B, and Q/B were taken from Corrales et al. (2017) model on the Israeli EEZ (model area: 3725 km2 from 0-200 m depth). Their vital rates (P/B and QB) were corrected from other EwE regional models using Opitz (1996), or empirically estimated using Pauly et al. (1990).For a full review of the multiple quality assurance measures undergone to develop the Israeli EEZ model, please refer to sections 2.3-2.5 of Corrales et al. (2017).

Herbivorous fish biomass was calculated from 20 m depth trawl survey data (Goren, *unpublished results*). All other fisheries biomass estimates were calculated from trawl fishery data along the 70-m depth contour offshore the Ashdod coastline to Gaza (31.4932 N, 34.28651 E to 31.40753 N, 34.2241 E) over 2.75 km2 of substrate. The P/B and Q/B estimates from Corrales et al. (2017) were deemed accurate for placement in this model, as they were calibrated to the 0-200 m depth gradient for Israel.

1. **INPUT PARAMETER SOURCES**

| **Functional groups** | **Sources and References** |
| --- | --- |
|  |  |
| **1. Phytoplankton** (spp.) | |
|  |  |
| B | Data taken from Grossowicz surveys in Ashdod (Grossowicz, 2016) |
| P/B | Data taken from Grossowicz surveys in Ashdod (Grossowicz, 2016). |
|  |  |
| **2. Benthic primary producer** (spp.) | |
|  |  |
| B | Estimated using a EE = 0.7 (2008-2012 data; Corrales et al. 2017) |
| PB | Corrales et al. (2015). Data corrected following Opitz (1996) |
|  |  |
| **3. Micro and Mesozooplankton** (spp.) | |
|  |  |
| B | [Terbiyik Kurt and Polat (2013)](file:///C:\Users\leigh\OneDrive\Documents\Thesis\3%20EwE%20Ashdod\Ecopath%20data\Biomass_50%20km-2.xlsx#Sheet1!_ENREF_247) |
| PB | Siokou-Frangou et al. (2002) and Zervoudaki et al. (2011) |
| QB | [Estimated using a P/Q = 0.33 (Hansen et al., 2000)](file:///C:\Users\leigh\OneDrive\Documents\Thesis\3%20EwE%20Ashdod\Ecopath%20data\Biomass_50%20km-2.xlsx#Sheet1!_ENREF_111) |
| Diet | Calbet et al. (2002) and Zervoudaki et al. (2007) |
|  |  |
| **4. Macrozooplankton** (euphasids, pteropods and fish larvae and eggs) | |
|  |  |
| B | Estimated using a EE = 0.95 in Corrales et al., 2017 |
| PB | Labat and Cuzin-Roudy (1996). Data corrected following Opitz (1996) |
| QB | Baamstedt and Karlson (1998). Data corrected following Opitz (1996) |
| Diet | [Baamstedt and Karlson (1998)](file:///C:\Users\leigh\OneDrive\Documents\Thesis\3%20EwE%20Ashdod\Ecopath%20data\Biomass_50%20km-2.xlsx#Sheet1!_ENREF_14) |
|  |  |
| **5. Gelatinous plankton** (cubozoa, hydrozoa, scyphozoa, tunicata) | |
|  |  |
| B | Estimated using a EE = 0.3 in Corrales et al., 2017 |
| PB | Malej (1989). Data corrected following Opitz (1996) |
| QB | Malej (1989). Data corrected following Opitz (1996) |
| Diet | Graham and Kroutil (2001) and Orek (2000) |
|  |  |
| **6. Polychaetes** (nematods and annelids) | |
|  |  |
| B | [Mutlu et al. (2010)](file:///C:\Users\leigh\OneDrive\Documents\Thesis\3%20EwE%20Ashdod\Ecopath%20data\Biomass_50%20km-2.xlsx#Sheet1!_ENREF_177) |
| PB | Serrano (2012) and Sardá et al. (2000). Data corrected following Opitz (1996) |
| QB | [From the empirical equation of Cammen (1979)](file:///C:\Users\leigh\OneDrive\Documents\Thesis\3%20EwE%20Ashdod\Ecopath%20data\Biomass_50%20km-2.xlsx#Sheet1!_ENREF_40) |
| Diet | [Fauchald and Jumars (1979)](file:///C:\\Users\\leigh\\OneDrive\\Documents\\Thesis\\3%20EwE%20Ashdod\\Ecopath%20data\\Biomass_50%20km-2.xlsx" \l "Sheet1!_ENREF_87" \o "Fauchald, 1979 #177) |
|  |  |
| **7. Suprabenthos** (mysids, isopods, amphipods, cumaceans and copepods) | |
|  |  |
| B | Estimated using a EE = 0.8 in Corrales et al., 2017 |
| PB | Corbera et al. (2013). Data corrected following Opitz (1996) |
| QB | Cartes and Maynou (2001). Data corrected following Opitz (1996) |
| Diet | [Cartes et al. (2001)](file:///C:\Users\leigh\OneDrive\Documents\Thesis\3%20EwE%20Ashdod\Ecopath%20data\Biomass_50%20km-2.xlsx#Sheet1!_ENREF_44) |
|  |  |
| **8. Shrimps (***Aristeus antennatus, Aristaemorpha foliacea, Parapennaeus longirostris, Plesionika martia* and *Squilla mantis, Marsupennaeus japonicus, Metapenaeopsis aegyptia, Metapenaeus monoceros, Penaeus semisulcatus and Trachysalambria curvirostris)* | |
|  |  |
| B | Combined data from Native and Alien shrimps from Corrales et al., 2017. |
| PB | Combined data from Native and Alien shrimps from Corrales et al., 2017 with weighted average. |
| QB | Combined data from Native and Alien shrimps from Corrales et al., 2017 with weighted average. |
| Diet | Combined from Corrales et al., 2017 (simple addition) |
|  |  |
|  |  |
| **9. Crabs** (*Alpheus* spp*., Callinectes sapidus, Calappa granulata, Dardanus arrosor, Inachus dorsettensis, Latreilla elegans, Medorippe lanata* and *Scyllarides lateus, Charybdis longicollis, Erugosquilla massavensis, Ixa monody, Myra subgranulata and Portunus pelagicus)* | |
|  |  |
| B | Combined data from Native and Alien shrimps from Corrales et al., 2017. |
| PB | Combined data from Native and Alien shrimps from Corrales et al., 2017 with weighted average. |
| QB | Combined data from Native and Alien shrimps from Corrales et al., 2017 with weighted average. |
| Diet | Combined from Corrales et al., 2017 (simple addition) |
|  |  |
| **10. Benthic invertebrates** (echinoderms, bivalves, gastropods, cnidarians and sponges) | |
|  |  |
| B | Estimated using a EE = 0.8 |
| PB | Moodley et al. (1998). Data corrected following Opitz (1996) |
| QB | [Brey (2001)](file:///C:\Users\leigh\OneDrive\Documents\Thesis\3%20EwE%20Ashdod\Ecopath%20data\Biomass_50%20km-2.xlsx#Sheet1!_ENREF_38) |
| Diet | Millar (1971), Perron and Turner (1978), Lalli and Gilmer (1989), Coulon and Jangoux (1993), Juan et al. (2007) and Baeta and Ramón (2013) |
|  |  |
| **11. Benthic cephalopods** (*Octopus vulgaris, Sepia elegans, Sepia officinalis, Sepia orbignyana* and *Sepietta oweniana*) | |
|  |  |
| B | Corrales et al. 2017 estimates from bottom trawl surveys (Edelist et al., 2011; Edelist et al., 2013a) |
| PB | Corrales et al. 2017 estimates from: Corrales et al. (2015). Data corrected following Opitz (1996) |
| QB | Corrales et al. 2017 estimates from: Iglesias et al. (1996) and Quintela and Andrade (2002) |
| Diet | Corrales et al. 2017 estimates from: Quetglas et al. (1998), Alves et al. (2006) and Neves et al. (2009) |
|  |  |
| **12. Benthopelagic cephalopods** (*Illex coindetii* and *Loligo vulgaris*) | |
|  |  |
| B | Bottom trawl surveys (Edelist et al., 2011; Edelist et al., 2013a) |
| PB | [Coll et al. (2013)](file:///C:\Users\leigh\OneDrive\Documents\Thesis\3%20EwE%20Ashdod\Ecopath%20data\Biomass_50%20km-2.xlsx#Sheet1!_ENREF_51) |
| QB | [Coll et al. (2013)](file:///C:\Users\leigh\OneDrive\Documents\Thesis\3%20EwE%20Ashdod\Ecopath%20data\Biomass_50%20km-2.xlsx#Sheet1!_ENREF_51) |
| Diet | Pierce et al. (1994) and Rosas-Luis et al. (2013) |
|  |  |
|  |  |
| **13. Hake** (*Merluccius merluccius*) | |
|  |  |
| B | Ashdod bottom trawl surveys (unpublished data; Goren 2017) |
| PB | Z=F+M; M= empirical equation from Pauly (1980). L∞ and K from Mehanna (2009b) |
| QB | From the empirical equation of Pauly et al. (1990). W∞ from Mehanna (2009b) |
| Diet | [Philips (2012)](file:///C:\Users\leigh\OneDrive\Documents\Thesis\3%20EwE%20Ashdod\Ecopath%20data\Biomass_50%20km-2.xlsx#Sheet1!_ENREF_206) |
|  |  |
| **14. Mullets** (*Mullus barbatus* and *Mullus surmuletus*) | |
|  |  |
| B | Ashdod bottom trawl surveys (unpublished data; Goren 2017) |
| PB | Z=F+M; M= empirical equation from Pauly (1980). L∞ and K from Mehanna (2009c) and Mehanna (2009a) |
| QB | From the empirical equation of Pauly et al. (1990). W∞ from Edelist et al. (2013c) |
| Diet | [Golani (1994)](file:///C:\\Users\\leigh\\OneDrive\\Documents\\Thesis\\3%20EwE%20Ashdod\\Ecopath%20data\\Biomass_50%20km-2.xlsx" \l "Sheet1!_ENREF_100" \o "Golani, 1994 #203) |
|  |  |
| **15. Demersal fishes** *(Conger conger, Cheilodipterus novemstriatus, Jaydia smithi, Lagocephalus sceleratus, Nemipterus randalli, Ostorhinchus fasciatus, Plotosus lineatus and Apogonichthyoides pharaonis, Callionymus filamentosus, Equulites klunzingeri, Lagocephalus spadiceus, L. suezensis, Pomadasys incisus, Sargocentron rubrum, Sillago sihama, Stephanolepis diaspros, Epinephelus aeneus, Ariosoma balearicum, Balistes capriscus, Callionymus risso, Chelidonichthys lucerna, Dactylopterus volitans, Echelus myrus, Echeneis naucrates, Lepidotrigla cavillone, Lithognathus mormyrus, Liza aurata, Pagellus acarne, P. erythrinus, Pomadasys incisus, Scorpaena maderensis, Serranus cabrilla, S. hepatus, Sparus aurata, Synodus saurus, Trachinus araneus, T. draco, Uranoscopus scaber)* | |
|  |  |
| B | Ashdod bottom trawl surveys (unpublished data; Goren 2017); estimated using EE = 0.96 |
| PB | Z=F+M; M= empirical equation from Pauly (1980). L∞ and K from Ismen (2005) and Işmen (2006) |
| QB | From the empirical equation of Pauly et al. (1990). W∞ from Edelist (2014) |
| Diet | [Golani (1994)](file:///C:\Users\leigh\OneDrive\Documents\Thesis\3%20EwE%20Ashdod\Ecopath%20data\Biomass_50%20km-2.xlsx#Sheet1!_ENREF_100) |
|  |  |
| **16. Goatfishes** (*Upeneus moluccensis* and *Upeneus pori*) | |
|  |  |
| B | Ashdod bottom trawl surveys (unpublished data; Goren 2017) |
| PB | Z=F+M; M= empirical equation from Pauly (1980). L∞ and K from Ismen (2005) and Işmen (2006) |
| QB | From the empirical equation of Pauly et al. (1990). W∞ from Edelist (2014) |
| Diet | [Golani (1994)](file:///C:\Users\leigh\OneDrive\Documents\Thesis\3%20EwE%20Ashdod\Ecopath%20data\Biomass_50%20km-2.xlsx#Sheet1!_ENREF_100) |
|  |  |
| **17. Rocky fish** | *Apogon imberbis,Diplodus annularis, Diplodus cervinus, Diplodus sargus, Diplodus vulgaris* |
|  |  |
| B | Ashdod bottom trawl surveys (unpublished data; Goren 2017) |
| PB | Z=F+M; M= empirical equation from Pauly (1980). L∞ and K from Garnaud (1962), Dulčić and Kraljević (1995), (Bradai et al., 1998), and (Pajuelo et al., 2003b) and Apostolidis and Stergiou (2014) |
| QB | From the empirical equation of Pauly et al. (1990). W∞ from Karakulak et al. (2006), Sangun et al. (2007), Edelist et al. (2013c) and Edelist (2014) |
| Diet | Pölzer and Patzner (1998) Labropoulou and Papadopoulou-Smith (1999), Derbal et al. (2007), Benchalel et al. (2010), Lipsky (2012) and Chaouch et al. (2013) |
|  |  |
|  |  |
| **18. Flatfishes** *(Arnoglossus spp., Bothus podas,Citharus linguatula, Cynoglossus sinusarabici, Solea solea )* | |
|  |  |
| B | Ashdod bottom trawl surveys (unpublished data; Goren 2017) |
| PB | Z=F+M; M= empirical equation from Pauly (1980). L∞ and K from Mehanna (2009b) |
| QB | From the empirical equation of Pauly et al. (1990). W∞ from Mehanna (2009b) |
| Diet | [Philips (2012)](file:///C:\Users\leigh\OneDrive\Documents\Thesis\3%20EwE%20Ashdod\Ecopath%20data\Biomass_50%20km-2.xlsx#Sheet1!_ENREF_206) |
|  |  |
|  |  |
| **19. Herbivorous fish** (*Siganus luridus* and *S. rivulatus*) | |
|  |  |
| B | Bottom trawl surveys (Edelist et al., 2011; Edelist et al., 2013a) |
| PB | Z=F+M; M= empirical equation from Pauly (1980). L∞ and K from Bariche (2005) |
| QB | From the empirical equation of Pauly et al. (1990). W∞ from Abdallah (2002) |
| Diet | [Lundberg and Golani (1995)](file:///C:\Users\leigh\OneDrive\Documents\Thesis\3%20EwE%20Ashdod\Ecopath%20data\Biomass_50%20km-2.xlsx#Sheet1!_ENREF_155) |
|  |  |
| **20. Lizardfish** (*Saurida lessepsianus*) | |
|  |  |
| B | Ashdod bottom trawl surveys (unpublished data; Goren 2017) |
| PB | Z=F+M; M= empirical equation from Pauly (1980). L∞ and K from Schintu et al. (1994), Ozutok and Avsar (2002) Turkmen (2003) and Türker Çakir et al. (2005) |
| QB | From the empirical equation of Pauly et al. (1990). W∞ from Abdallah (2002), Turkmen (2003), Sangun et al. (2007) and Edelist (2014) |
| Diet | Bayhan et al. (2009), Karachle and Stergiou (2011) and Abid et al. (2013) |
|  |  |
| **21. Benthopelagic fishes** *(Boops boops, Macrorhamphosus scolopax, Spicara maena and S. smaris)* | |
|  |  |
| B | Ashdod bottom trawl surveys (unpublished data; Goren 2017) |
| PB | Z=F+M; M= empirical equation from Pauly (1980). L∞ and K from Garnaud (1962), Dulčić and Kraljević (1995), (Bradai et al., 1998), and (Pajuelo et al., 2003b) and Apostolidis and Stergiou (2014) |
| QB | From the empirical equation of Pauly et al. (1990). W∞ from Karakulak et al. (2006), Sangun et al. (2007), Edelist et al. (2013c) and Edelist (2014) |
| Diet | Pölzer and Patzner (1998) Labropoulou and Papadopoulou-Smith (1999), Derbal et al. (2007), Benchalel et al. (2010), Lipsky (2012) and Chaouch et al. (2013) |
|  |  |
| **22. Mesopelagic fishes (***Chlorophthalmus agassizi, Hygophum hygomii, Lampanyctus crocodilus, L. pusillus, Myctophium punctatum, Stomias boa and Vinciguerria poweridae)* | |
|  |  |
| B | Bottom trawl surveys (Edelist et al., 2011; Edelist et al., 2013a) |
| PB | Z=F+M; M= empirical equation from Pauly (1980). L∞ and K from Rafail et al. (1968), Papaconstantinou (1982), Cavallaro et al. (1985), Bradai and Bouain (1988), Erzini (1991), Papaconstantinou et al. (1993), Koutrakis and Sinis (1994), Faltas and Abdallah (1997), Tosunoglu et al. (1997), Stergiou et al. (1998), Chakroun-Marzouk (1999), Chakroun-Marzouk and Ktari (2001), Kaya et al. (2001), Pajuelo et al. (2003a), Türkmen and Akyurt (2003), Ismen et al. (2004), Mesa et al. (2005), Mehanna (2007), Bilgin and Çelik (2009), El -Hawwet et al. (2009), Ilhan et al. (2010), Ismen et al. (2013) and Soykan et al. (2013) |
| QB | From the empirical equation of Pauly et al. (1990). W∞ from Papaconstantinou et al. (1993), Petrakis and Stergiou (1995), Stergiou and Moutopoulos (2001), Morato et al. (2001), Abdallah (2002), Cicek et al. (2006), Karakulak et al. (2006), Mehanna (2007), Sangun et al. (2007), El -Hawwet et al. (2009), Edelist et al. (2013c) and Edelist (2014) |
| Diet | Caragitsou and Papaconstantinou (1988), Papaconstantinou and Caragitsou (1989), Papaconstantinou et al. (1989), Bradai and Bouain (1988), Caragitsou and Papaconstantinou (1994), Labropoulou and Eleftheriou (1997), Labropoulou and Machias (1998), Terrats et al. (2000), Morte et al. (2001), Pallaoro et al. (2004), Chaoui et al. (2005), Kallianiotis et al. (2005), Boudaya et al. (2007), Derbal and Kara (2007), Fehri and Gharbi (2008), Ben Hadj Hamida et al. (2009), Bilecenoglu (2009), Fehri-Bedoui et al. (2009), Esposito et al. (2009), Montanini et al. (2010), Stagioni et al. (2012) and Ismen et al. (2013) |
|  |  |
| **23. Sharks**  *(Carchinus obscurus, C. plumbeus and Mustelus mustelus)* | |
|  |  |
| B | Bottom trawl surveys (Edelist et al., 2011; Edelist et al., 2013a) |
| PB | Z=F+M; M= empirical equation from Pauly (1980). L∞ and K from Rafail and Jukic (1971), Rafail (1972), Ezzat et al. (1981), Mennes (1985), Kara and Derbal (1995) and Chemmam-Abdelkader et al. (2004) |
| QB | From the empirical equation of Pauly et al. (1990). W∞ from Rafail (1972), Ceyhan et al. (2009), Torres et al. (2012), Edelist et al. (2013c) and Edelist (2014) |
| Diet | Derbal and Kara (1996), Morales-Nin and Moranta (1997), Lamrini and Bouymajjane (2002) and Lipsky (2012) |
|  |  |
| **24. Rays and skates** *(Dasyatis chrysonota, D. pastinaca, Raja miraletus, Rhinobatos rhinobatos, R. cemiculus, Torpedo marmorata and T. torpedo)* | |
|  |  |
| B | Ashdod bottom trawl surveys (unpublished data; Goren 2017) |
| PB | Z=F+M; M= empirical equation from Pauly (1980). L∞ and K from Bariche (2005) |
| QB | From the empirical equation of Pauly et al. (1990). W∞ from Abdallah (2002) |
| Diet | [Lundberg and Golani (1995)](file:///C:\Users\leigh\OneDrive\Documents\Thesis\3%20EwE%20Ashdod\Ecopath%20data\Biomass_50%20km-2.xlsx#Sheet1!_ENREF_155) |
|  |  |
| **25. Small pelagic fish** *(Engraulis encrasicolus, Etrumeus teres, Sardina pilchardus and Sardinella aurita)* | |
|  |  |
| B | Ashdod bottom trawl surveys (unpublished data; Goren 2017) |
| PB | Z=F+M; M= empirical equation from Pauly (1980). L∞ and K from Radhakrishnan (1957), Golani and Ben‐Tuvia (1985) and Özütok and Avşar (2004) |
| QB | From the empirical equation of Pauly et al. (1990). W∞ from Taskavak and Bilecenoglu (2001), Cicek et al. (2006), Edelist et al. (2013c) and Edelist (2014) |
| Diet | Golani et al. (1983), Golani and Diamant (1991), Golani (1993b), Lipsky (2012) and AmtyazSafi et al. (2013) |
|  |  |
| **26. Mackerel** *(Trachurus mediterraneus,* Scomberidae*)* | |
|  |  |
| B | Ashdod bottom trawl surveys (unpublished data; Goren 2017) |
| PB | Z=F+M; M= empirical equation from Pauly (1980). L∞ and K from Pauly (1978), Aydin (2011) and Innal et al. (2015) |
| QB | From the empirical equation of Pauly et al. (1990). W∞ from Edelist et al. (2013c) and Edelist (2014) |
| Diet | Golani (2002), Gurlek et al. (2010), Aydin (2011) and Lee (2011) |
|  |  |
| **27. Medium pelagic fishes** *(Alepes djedaba, Caranx crysos, Sphyraena chrysotaenia and S. sphyraena; Decapterus russelli and Fistularia commersonii)* | |
|  |  |
| B | Ashdod bottom trawl surveys (unpublished data; Goren 2017) |
| PB | Z=F+M; M= empirical equation from Pauly (1980). L∞ and K from Tsimenidis (1980), D’onghia et al. (2000), Nouar (2004) and Filiz et al. (2006) |
| QB | From the empirical equation of Pauly et al. (1990). W∞ from Tsimenidis and Ondrias (1980), D’onghia et al. (2000), Filiz et al. (2006) and Edelist et al. (2013c). |
| Diet | Macpherson (1981), Negzaoui-Garali et al. (2008), Sever et al. (2008), Consoli et al. (2010) and Anastasopoulou et al. (2013) |
|  |  |
| **28. Large pelagic fishes** *(Euthynnus alletteratus, Seriola dumerili, Scomberomorus commersoni)* | |
|  |  |
| B | Ashdod bottom trawl surveys (unpublished data; Goren 2017) |
| PB | Z=F+M; M= empirical equation from Pauly (1980). L∞ and K from Brethes (1975), Rizkalla (1997), Mehanna (2010) and Josephides (2011) |
| QB | From the empirical equation of Pauly et al. (1990). W∞ from Gökçe et al. (2009), Mehanna (2010), Josephides (2011) and Edelist et al. (2013c) |
| Diet | Khoury (1987), Derbal and Kara (2008) and Sever et al. (2013). |
|  |  |
| **29. Turtles** *(Caretta caretta and Chelonia mydas)* | |
|  |  |
| B | [Estimated by EE = 0.5 based on Levy et al. (2015)](file:///C:\Users\leigh\OneDrive\Documents\Thesis\3%20EwE%20Ashdod\Ecopath%20data\Biomass_50%20km-2.xlsx#Sheet1!_ENREF_152) |
| PB | Tsagarakis et al. (2010). Data corrected following Opitz (1996) |
| QB | Polovina (1984). Data corrected following Opitz (1996) |
| Diet | [Tomas et al. (2001)](file:///C:\\Users\\leigh\\OneDrive\\Documents\\Thesis\\3%20EwE%20Ashdod\\Ecopath%20data\\Biomass_50%20km-2.xlsx" \l "Sheet1!_ENREF_249" \o "Tomas, 2001 #799) |
|  |  |
| **30. Dolphins** *(Delphinus delphis, Grampus griseus, Stenella coeruleoalba, Steno bredanensis, Tursiops truncatus and Ziphius cavirostris)* | |
|  |  |
| B | Bottom trawl surveys (Edelist et al., 2011; Edelist et al., 2013a) |
| PB | Z=F+M; M= empirical equation from Pauly (1980). L∞ and K from Simpfendorfer et al. (2002) and Goosen and Smale (1997) |
| QB | From the empirical equation of Pauly et al. (1990). W∞ from Filiz and Bilge (2004) and Edelist et al. (2013c) |
| Diet | Saidi et al. (2007) and Saidi et al. (2009) |
|  |  |
| **31. Cages** *(Sparus aurata)* | |
|  |  |
| B | Estimated from GiliOcean production in first year (1000 tonnes harvest biomass) and scaled to 50 km-2 |
| PB | Bayle-Sempere et al., 2013 'reared gilthead seabream' |
| QB | Bayle-Sempere et al., 2013 'reared gilthead seabream' |
| Diet | Cages consume pellets and zooplankton (pers. comm. cage operators) |
|  | |
| **32. Bacteria** | |
|  |  |
| B | Data taken from Robarts et al. (2006) |
| PB | Berman et al. (1984) |
| QB | Berman et al. (1984) |
| Diet | Grossowicz 2016 |
|  |  |
| **33. Detritus** | |
|  |  |
| B | [Corrales et al., 2017](file:///C:\Users\leigh\OneDrive\Documents\Thesis\3%20EwE%20Ashdod\Ecopath%20data\Biomass_50%20km-2.xlsx#Sheet1!_ENREF_202) |
|  |  |
| **34. Discards** | |
|  |  |
| Amount | Cooper et al. (2003), Edelist et al. (2013b), Kerem et al. (2014) and Levy et al. (2015) |
|  |  |
| **35. Pellets** | |
|  |  |
| B | Based on amount of pellets (total tonnes) inputted per year, scales to 50 km-2 |
| Diet | Pellets eaten by Fish Cages, and 10% estimated to be eaten by pelagic fishes/benthos outside of cages |
|  |  |
|  |  |

**Balancing the Ecopath Model**

1. **PREBAL statistics**

In this table, we can see that the model is balanced as (1) P/Q is between 0.1 to 0.35, (2) R/A < 1, (3) R/B remains between 1-10 for nekton, and greater values for small organisms, (4) NE > GE, and (5) P/R < 1. Notable exceptions in **bold**.

**References**

Abdallah, M., 2002. Length-weight relationship of fishes caught by trawl off Alexandria, Egypt. Naga, The ICLARM Quarterly 25, 19-20.

Abid, S., Ouannes-Ghorbel, A., Jarboui, O., Bouain, A., 2013. Diet composition and feeding habits of the wide-eyed flounder, Bothus podas, in the Gulf of Gabes (Tunisia). Marine Biodiversity 43, 149-161.

Alves, D.M., Cristo, M., Sendão, J., Borges, T.C., 2006. Diet of the cuttlefish Sepia officinalis (Cephalopoda: Sepiidae) off the south coast of Portugal (eastern Algarve). Journal of the Marine Biological Association of the United Kingdom 86, 429-436.

AmtyazSafi, M., Khan, M.Z., Hashmi, M.U.A., 2013. Observations on the Food and Feeding Habits of Striped piggy, Pomadasys stridens (Forsskal, 1775)(Family; Pomadasyidae) from Karachi Coast, Pakistan. International Journal of Fauna and Biological Studies 1, 7-14.

Anastasopoulou, A., Mytilineou, C., Lefkaditou, E., Kavadas, S., Bekas, P., Smith, C.J., Papadopoulou, K.N., Christides, G., 2013. The diet and feeding ecology of Conger conger (L. 1758) in the deep waters of the Eastern Ionian Sea. Mediterranean Marine Science 14, 365-368.

Apostolidis, C., Stergiou, K., 2014. Estimation of growth parameters from published data for several Mediterranean fishes. Journal of Applied Ichthyology 30, 189-194.

Baeta, M., Ramón, M., 2013. Feeding ecology of three species of Astropecten (Asteroidea) coexisting on shallow sandy bottoms of the northwestern Mediterranean Sea. Marine Biology 160, 2781-2795.

Bariche, M., 2005. Age and growth of Lessepsian rabbitfish from the eastern Mediterranean. Journal of Applied Ichthyology 21, 141-145.

Bayhan, B., Sever, T.M., 2009. Food and feeding habits of the Atlantic horse mackerel, Trachurus trachurus, from the Aegean Sea (Osteichthyes: Carangidae). Zoology in the Middle East 46, 47-54.

Ben Hadj Hamida, N., Ben Abdallah, O., Ghorbel, M., Jarboui, O., Missaoui, H., 2009. The Feeding Habits of the Bluespotted Seabream, Pagrus caeruleostictus (Valenciennes, 1830), in the Gulf of Gabes (Central Mediterranean). Reviews in Fisheries Science 18, 65-72.

Benchalel, W., Derbal, F., Kara, M.H., Rousseau, Y., Galzin, R., Maréchal, J.P., Bailly, N., Chanet, B., 2010. Régime alimentaire du sar commun Diplodus sargus sargus (Sparidae) des côtes de l’est algérien. Cybium 34, 231-242.

Bilecenoglu, M., 2009. Growth and feeding habits of the brown comber, Serranus hepatus (Linnaeus, 1758) in Izmir Bay, Aegean Sea. Acta adriatica 50.

Bilgin, S., Çelik, E., 2009. Age, growth and reproduction of the black scorpionfish, Scorpaena porcus (Pisces, Scorpaenidae), on the Black Sea coast of Turkey. Journal of Applied Ichthyology 25, 55-60.

Boudaya, L., Neifar, L., Taktak, A., Ghorbel, M., Bouain, A., 2007. Diet of Chelidonichthys obscurus and Chelidonichthys lastoviza (Pisces: Triglidae) from the Gulf of Gabes (Tunisia). Journal of Applied Ichthyology 23, 646-653.

Bradai, M., Ghorbel, M., Jarboui, O., Bouain, A., 1998. Croissance de trois especes de sparidés: Diplodus puntazzo, D. vulgaris et Spondyliosoma cantharus du golfe de Gabes (Tunisie). Cahiers Options Méditerranéennes 35, 51-56.

Bradai, M.N., Bouain, A., 1988. Croissance lineaire absolue des rascasses (Scorpaena porcus et S. scrofa) du golfe de Gabes (Tunisie). Rapp. Comm. Int. Mer Méditerr. 31, 265.

Brethes, J., 1975. La bécasse de mer des eaux atlantiques marocaines. Premières observations sur la biométrie et la biologie. Trav. Doc. Dev. Pêches Maroc 15, 1-39.

Brey, T., 2001. Population dynamics in benthic invertebrates. A virtual handbook. <http://www>. awi-bremerhaven. de/Benthic/Ecosystem/FoodWeb/Handbook/main. html. Alfred Wegener Institute for Polar and Marine Research, Germany.

Calbet, A., Broglio, E., Saiz, E., Alcaraz, M., 2002. Low grazing impact of mesozooplankton on the microbial communities of the Alboran Sea: a possible case of inhibitory effects by the toxic dinoflagellate Gymnodinium catenatum. Aquatic microbial ecology 26, 235-246.

Cammen, L.M., 1979. Ingestion rate: an empirical model for aquatic deposit feeders and detritivores. Oecologia 44, 303-310.

Caragitsou, E., Papaconstantinou, C., 1988. Feeding habits of red pandora (Pagellus erythrinus) off the western coast of Greece. Journal of Applied Ichthyology 4, 14-22.

Cartes, J.E., Elizalde, M., Sorbe, J.-C., 2001. Contrasting life-histories, secondary production, and trophic structure of Peracarid assemblages of the bathyal suprabenthos from the Bay of Biscay (NE Atlantic) and the Catalan Sea (NW Mediterranean). Deep Sea Research Part I 48, 2209-2232.

Cavallaro, G., Cefali, A., Potoschi, A., Sotiriadis, S., 1985. Aspects of Oblada melanura(L. 1758) biology(Pisces: Sparidae). Memorie di biologia marina e di oceanografia. Messina 15, 129-140.

Ceyhan, T., Akyol, O., Erdem, M., 2009. Length-Weight Relationships of Fishes from Gokova Bay, Turkey (Aegean Sea). Turkish Journal of Zoology 33.

Corrales, X., Coll, M., Tecchio, S., Bellido, J.M., Fernández, Á.M., Palomera, I., 2015. Ecosystem structure and fishing impacts in the northwestern Mediterranean Sea using a food web model within a comparative approach. Journal of Marine Systems 148, 183-199.

Coulon, P., Jangoux, M., 1993. Feeding rate and sediment reworking by the holothuroid Holothuria tubulosa (Echinodermata) in a Mediterranean seagrass bed. Marine ecology. Progress series 92, 201-204.

Chakroun-Marzouk, N., 1999. Croissance de Pagrus caeruleostictus (Valenciennes, 1830) (Poisson Teleosteen, Sparidae) des cotes Tunisiennes. Bull. Inst. Natn. Scien. Tech. Mer de Salammbô 26, 85-101.

Chakroun-Marzouk, N., Ktari, M., 2001. Age et croissance du corb méditerranéen (Sciaena umbra Linnaeus, 1758) des côtes tunisiennes. Rapp. Comm. Int. Mer Medit 36, 252.

Chaouch, H., Hamida, O.B.A.-B.H., Ghorbel, M., Jarboui, O., 2013. Diet composition and food habits of Diplodus puntazzo (Sparidae) from the Gulf of Gabès (Central Mediterranean). Journal of the Marine Biological Association of the United Kingdom 93, 2257-2264.

Chaoui, L., Hichem Kara, F.D.M., Quignard, J.P., 2005. Alimentation et condition de la dorade Sparus aurata (Teleostei: Sparidae) dans la lagune du Mellah (Algérie Nord-Est). CBM-Cahiers de Biologie Marine. 46, 221-226.

Chemmam-Abdelkader, B., M.M., K., El Abed, A., 2004. Etude de l'age et de la croissance de deux especes de dentes (Dentex dentex et de Dentex maroccanus) des cotes Tunisiennes. Bull. Inst. Natn. Scien. Tech. Mer de Salammbô 31, 43-51.

D’onghia, G., Mastrototaro, F., Maiorano, P., 2000. Biology of silver scabbard fish, Lepidopus caudatus (Trichiuridae), from the Ionian Sea (Eastern-central Mediterranean). Cybium 24, 249-262.

Derbal, F., Kara, H., 2007. Régime alimentaire du corb Sciaena umbra(Sciaenidae) des côtes de l’est algérien. Cybium 31, 189-197.

Derbal, F., Nouacer, S., Kara, M.H., 2007. Composition et variations du régime alimentaire du sparaillon Diplodus annularis (Sparidae) du golfe d'Annaba (Est de l'Algérie). Cybium 31, 443-450.

Dulčić, J., Kraljević, M., 1995. Age, growth and mortality of damselfish (< i> Chromis chromis</i> L.) in the eastern middle Adriatic. Fisheries Research 22, 255-264.

Edelist, D., 2014. New length–weight relationships and Lmax values for fishes from the Southeastern Mediterranean Sea. Journal of Applied Ichthyology 30, 521-526.

Edelist, D., Rilov, G., Golani, D., Carlton, J.T., Spanier, E., 2013a. Restructuring the Sea: profound shifts in the world's most invaded marine ecosystem. Diversity and Distributions 19, 69-77.

Edelist, D., Scheinin, A., Sonin, O., Shapiro, J., Salameh, P., Rilov, G., Benayahu, Y., Schulz, D., Zeller, D., 2013b. Israel: Reconstructed estimates of total fisheries removals in the Mediterranean, 1950–2010. Acta adriatica 54.

Edelist, D., Sonin, O., Golani, D., Rilov, G., Spanier, E., 2011. Spatiotemporal patterns of catch and discards of the Israeli Mediterranean trawl fishery in the early 1990s: ecological and conservation perspectives. Scientia Marina 75, 641-652.

Edelist, D., Spanier, E., Golani, D., 2013c. Ecological indicators for overfishing in Israel's trawl fishery. University of Haifa, Haifa.

El -Hawwet, A.A.K., A.A., E.-G., Mahmoud, H.H., 2009. Stock assessment of Pagellus erythrinus of the South Levant (GSA 26). GFCM-SAC.

Erzini, K., 1991. A compilation of data on variability in length-age in marine fishes. Fisheries Stock Assessment, Title XII, Collaborative Research Program. University of Rhode Island, p. 36.

Ezzat, A., Wadie, W., Mikhail, M., Hashem, M., 1981. Age and growth of Epinephelus aeneus in the Egyptian Mediterranean waters. Bull. Inst. Oceanogr. Fish. Cairo 7, 395-406.

Faltas, S., Abdallah, M., 1997. Growth, mortality and relative yield per recruit of two triglid species from the Egyptian Mediterranean, off Alexandria. Bull. Nat. Inst. of Oceanogr. & Fish., ARE 23, 473-484.

Fauchald, K., Jumars, P.A., 1979. The diet of worms: a study of polychaete feeding guilds.

Fehri-Bedoui, R., Mokrani, E., Ben Hassine, O.K., 2009. Feeding habits of Pagellus acarne (Sparidae) in the Gulf of Tunis, central Mediterranean. Scientia Marina 73, 667-678.

Fehri, R., Gharbi, H., 2008. Sex-ratio, reproduction and feeding habits of Pomadasys incisus (Haemulidae) in the Gulf of Tunis (Tunisia). Acta adriatica 49, 5-19.

Filiz, H., Bilge, G., 2004. Length–weight relationships of 24 fish species from the North Aegean Sea, Turkey. Journal of Applied Ichthyology 20, 431-432.

Filiz, H., Bilge, G., Irmak, E., Togulga, M., Uckun, D., Akalin, S., 2006. Age and growth of the hollowsnout grenadier, Caelorinchus caelorhincus (Risso, 1810), in the Aegean Sea. Journal of Applied Ichthyology 22, 285-287.

Garnaud, J., 1962. Monographie de l'Apogon méditerranéen, Apogon imberbis (Linné) 1758.

Gökçe, G., Cekic, M., Filiz, H., 2009. Length-weight relationships of marine fishes off Yumurtalık coast (İskenderun Bay), Turkey. Turkish Journal of Zoology 34, 101-104.

Golani, D., 1993a. The biology of the Red Sea migrant, Saurida undosquamis in the Mediterranean and comparison with the indigenous confamilial Synodus saurus (Teleostei: Synodontidae). Hydrobiologia 271, 109-117.

Golani, D., 1993b. Trophic adaptation of Red Sea fishes to the eastern Mediterranean environment—Review and new data. Israel Journal of Zoology 39, 391-402.

Golani, D., 1994. Niche separation between colonizing and indigenous goatfish (Mullidae) along the Mediterranean coast of Israel. Journal of Fish Biology 45, 503-513.

Golani, D., 2002. The Indo-Pacific striped eel catfish, Plotosus lineatus (Thunberg, 1787),(Osteichtyes: Siluriformes), a new record from the Mediterranean. Scientia Marina 66, 321-323.

Golani, D., 2010. Colonization of the Mediterranean by Red Sea fishes via the Suez Canal–Lessepsian migration, Fish Invasions of the Mediterranean Sea: Change and Renewal. Pensoft Publishers, Sofia-Moscow, pp. 145-188.

Golani, D., Ben-Tuvia, A., Galil, B., 1983. Feeding habits of the Suez Canal migrant squirrelfish, Sargocentron rubrum, in the Mediterranean Sea. Israel Journal of Zoology 32, 194-204.

Golani, D., Ben‐Tuvia, A., 1985. The biology of the Indo‐Pacific squirrelfish, Sargocentron rubrum (Forsskål), a Suez Canal migrant to the eastern Mediterranean. Journal of Fish Biology 27, 249-258.

Golani, D., Diamant, A., 1991. Biology of the sweeper, Pempheris vanicolensis Cuvier & Valenciennes, a Lessepsian migrant in the eastern Mediterranean, with a comparison with the original Red Sea population. Journal of Fish Biology 38, 819-827.

Goosen, A., Smale, M., 1997. A preliminary study of age and growth of the smoothhound shark Mustelus mustelus (Triakidae). South African Journal of Marine Science 18, 85-91.

Goren, M., Galil, B., 2002. Records of Cataetyx laticeps and Ophidion barbatum (Ophidiiformes) in the eastern Mediterranean, with comments on the deep sea ichthyofauna. Cybium 26, 150-152.

Graham, W.M., Kroutil, R.M., 2001. Size-based prey selectivity and dietary shifts in the jellyfish, Aurelia aurita. Journal of Plankton Research 23, 67-74.

Gurlek, M., Erguden, S., Yaglioglu, D., Turan, F., Demirhan, S., Gungor, M., Ozbalcilar, B., Ozcan, T., 2010. Feeding Habits of Indo-Pacific Species Nemipterus randalli Russel, 1986 (Nemipteridae) in Iskenderun Bay, Eastern Mediterranean Sea. Rapports et Procès-Verbaux des Réunions Commission Internationale pour l’Exploration Scientifique de la Mer Méditerranée 39, 539.

Hansen, P.J., BjØrnsen, P.K., Hansen, B.W., 2000. Zooplankton grazing and growth: Scaling within the 2–2,000‐µm body size range. Limnology and Oceanography 45, 1891-1891.

Ilhan, D., Akalin, S., Tosunoğlu, Z., Özaydin, O., 2010. Growth characteristics and reproduction of comber, Serranus cabrilla (Actinopterygii, Perciformes, Serranidae), in the Aegean Sea. Acta Ichthyologica et Piscatoria 40.

Innal, D., Aksu, M., Akdoganbulut, D., Kisin, B., Can, M., Unal, M.O., Dogangil, B., Pek, E., 2015. Age and growth of Nemipterus randalli from Antalya Gulf-Turkey.

Ismen, A., 2003. Age, growth, reproduction and food of common stingray (< i> Dasyatis pastinaca</i> L., 1758) in İskenderun Bay, the eastern Mediterranean. Fisheries Research 60, 169-176.

Ismen, A., 2005. Age, Growth and Reproduction of the Goldband Goatfish, Upeneus moluccensis (Bleeker, 1855), in İskenderun Bay, the Eastern Mediterranean. Turkish Journal of Zoology 29, 301-309.

Işmen, A., 2006. Growth and Reproduction of Por's Goatfish (Upeneus pori Ben-Tuvia & Golani, 1989) in İskenderun Bay, the Eastern Mediterranean. Turkish Journal of Zoology 30, 91-98.

Ismen, A., Arslan, M., Yigin, C., Bozbay, N., 2013. Age, growth, reproduction and feeding of John Dory, Zeus faber (Pisces: Zeidae), in the Saros Bay (North Aegean Sea). Journal of Applied Ichthyology 29, 125-131.

Ismen, A., Turkoglu, M., Yigin, C.C., 2004. The age, growth and reproduction of gray triggerfish (Balistes capriscus, Gmelin, 1789) in Iskenderun Bay. Pakistan Journal of Biological Sciences 7, 2135-2138.

Josephides, M., 2011. Stock assessment of Spicara smaris of the Cyprus Island (GSA 25). GFCM-SAC.

Juan, S.d., Cartes, J.E., Demestre, M., 2007. Effects of commercial trawling activities in the diet of the flat fish Citharus linguatula (Osteichthyes: Pleuronectiformes) and the starfish Astropecten irregularis (Echinodermata: Asteroidea). Journal of experimental marine biology and ecology 349, 152-169.

Kallianiotis, A., Torre, M., Argyri, A., 2005. Age, growth, mortality, reproduction and feeding habits of the striped seabream, Lithognathus mormyrus (Pisces: Sparidae) in the coastal waters of the Thracian Sea, Greece. Scientia Marina 69, 391-404.

Karachle, P., Stergiou, K., 2011. Feeding and ecomorphology of seven flatfish species in the North-North-West Aegean Sea, Greece. African Journal of Marine Science 33, 67-78.

Karachle, P., Stergiou, K., 2013. Feeding and ecomorphology of three clupeoids in the N Aegean Sea. Mediterranean Marine Science 15, 9-26.

Karakulak, F., Erk, H., Bilgin, B., 2006. Length–weight relationships for 47 coastal fish species from the northern Aegean Sea, Turkey. Journal of Applied Ichthyology 22, 274-278.

Karlou-Riga, C., 1995. Biology and dynamics of the Trachurus species (Pisces, Carangidae) in the Saronikos Gulf. PhD thesis. Aristotle University of Thessaloniki.(In Greek with English abstract), p. 296 pp.

Kaya, M., Özaydin, O., Benli, H.A., 2001. Age and Growth Parameters of Red Bandfish (Cepola rubescens L., 1766) in Izmir Bay. Turkish Journal of Zoology 25, 111-116.

Kerem, D., Goffman, O., Scheinin, A., Elasar, M., Hadar, N., Edelist, D., Sonin, O., 2014. Report on the status on Small Cetaceans.

Khoury, C., 1987. Ichtyofaune des herbiers de posidonies du Parc National de Port-Cros: composition, éthologie alimentaire et rôle dans le reseau trophique. Aix Marseille 2.

Koutrakis, E., Sinis, A., 1994. Growth analysis of grey mullets (Pisces, Mugilidae) as related to age and site. Israel Journal of Zoology 40, 37-53.

Labat, J.P., Cuzin-Roudy, J., 1996. Population dynamics of the krill Meganyctiphanes norvegica (M. Sars, 1857)(Crustacea: Euphausiacea) in the Ligurian Sea (NW Mediterranean Sea). Size structure, growth and mortality modelling. Journal of Plankton Research 18, 2295-2312.

Labropoulou, M., Eleftheriou, A., 1997. The foraging ecology of two pairs of congeneric demersal fish species: importance of morphological characteristics in prey selection. Journal of Fish Biology 50, 324-340.

Labropoulou, M., Machias, A., 1998. Effect of habitat selection on the dietary patterns of two triglid species. Marine Ecology Progress Series 173, 275-288.

Labropoulou, M., Papadopoulou-Smith, K.-N., 1999. Foraging behaviour patterns of four sympatric demersal fishes. Estuarine, Coastal and Shelf Science 49, 99-108.

Lalli, C.M., Gilmer, R.W., 1989. Pelagic snails: the biology of holoplanktonic gastropod mollusks. Stanford University Press.

Lamrini, A., Bouymajjane, A., 2002. Biologie de Dentex maroccanus (Valenciennes, 1830) dans la région de Safi. Actes Inst. Agron. Vet (Maroc) 22, 11-18.

Lee, R., 2011. Resource utilization by Indigenouse and Migrant fish species in the Eastern Mediterranean. Department of Zoology, University of Tel Aviv, Tel Aviv, p. 113.

Levy, Y., Frid, O., Weinberger, A., Sade, R., Adam, Y., Kandanyan, U., Berkun, V., Perry, N., Edelist, D., Goren, M., 2015. A small fishery with a high impact on sea turtle populations in the eastern Mediterranean. Zoology in the Middle East 61, 300-317.

Lipsky, G., 2012. Shipwrecks in the Levant Basin: Species-diversity hotspots or invader paradise. Department of Zoology, Tel Aviv University, Tel Aviv, p. 157.

Lundberg, B., Golani, D., 1995. Diet adaptations of Lessepsian migrant rabbitfishes, Siganus luridus and S. rivulatus, to the algal resources of the Mediterranean coast of Israel. Marine Ecology 16, 73-89.

Macpherson, E., 1981. Resource partitioning in a Mediterranean fish community. Marine Ecology Progress Series 4, 183-193.

Malej, A., 1989. Behaviour and trophic ecology of the jellyfish Pelagia noctiluca (Forsskål, 1775). Journal of experimental marine biology and ecology 126, 259-270.

Mehanna, S.F., 2007. A preliminary assessment and management of gilthead bream Sparus aurata in the Port Said fishery, the Southeastern Mediterranean, Egypt. Turkish Journal of Fisheries and Aquatic Sciences 7, 123-130.

Mehanna, S.F., 2009a. Growth, mortality and spawning stock biomass of the striped red mullet Mullus surmuletus, in the Egyptian Mediterranean waters. Mediterranean Marine Science 10, 5-18.

Mehanna, S.F., 2009b. Stock assessment of Merluccius merluccius of the South Levant (GSA 26). GFCM-SAC.

Mehanna, S.F., 2009c. Stock assessment of Mullus barbatus of the South Levant (GSA 26). GFCM-SAC.

Mesa, M.L., Mesa, G.L., Micalizzi, M., 2005. Age and growth of madeira scorpionfish,< i> Scorpaena maderensis</i> Valenciennes, 1833, in the central Mediterranean. Fisheries Research 74, 265-272.

Millar, R., 1971. The biology of ascidians. Advances in marine biology 9, 1-100.

Montanini, S., Stagioni, M., Vallisneri, M., 2010. Diet of the grey gurnard, Eutrigla gurnards in the Adriatic Sea, north-eastern Mediterranean. Cybium 34, 367-372.

Moodley, L., Heip, C.H., Middelburg, J.J., 1998. Benthic activity in sediments of the northwestern Adriatic Sea: sediment oxygen consumption, macro-and meiofauna dynamics. Journal of Sea Research 40, 263-280.

Morales-Nin, B., Moranta, J., 1997. Life history and fishery of the common dentex (Dentex dentex) in Mallorca (Balearic Islands, western Mediterranean). Fisheries Research 30, 67-76.

Morato, T., Afonso, P., Lourinho, P., Barreiros, J.P., Santos, R.S., Nash, R., 2001. Length–weight relationships for 21 coastal fish species of the Azores, north-eastern Atlantic. Fisheries Research 50, 297-302.

Morte, S., Redon, M.J., Sanz-Brau, A., 2001. Diet of Scorpaena porcus and Scorpaena notata (Pisces: Scorpaenidae) in the western Mediterranean. Cahiers de biologie marine 42, 333-344.

Mutlu, E., Çinar, M.E., Ergev, M.B., 2010. Distribution of soft-bottom polychaetes of the Levantine coast of Turkey, eastern Mediterranean Sea. Journal of Marine Systems 79, 23-35.

Negzaoui-Garali, N., Salem, M., Capapé, C., 2008. Feeding habits of the black anglerfish, Lophius budegassa (Osteichthyes: Lophiidae), off the Tunisian coast (central Mediterranean). Cahiers de biologie marine 49, 113-122.

Neves, A., Sequeira, V., Vieira, A.R., Paiva, R., Gordo, L.S., 2009. Feeding habits of the cuttlefish Sepia officinalis during its life cycle in the Sado estuary (Portugal). Hydrobiologia 636, 479-488.

Nouar, A., 2004. Croissance, mortalite et exploitation de Helicolenus dactylopterus dactylopterus (Delaroche, 1809) des cotes Algeriennes. Rapp. Comm. int. Mer Médit. 37, 412.

Opitz, S., 1996. Trophic interactions in Caribbean coral reefs. WorldFish.

Orek, H., 2000. An application of mass balance Ecopath model to the trophic structure in the Black Sea after anchovy collapse. Ms. In Marine Science, Middle East Technical University.

Ozutok, M., Avsar, D., 2002. Estimation of growth, mortality and the exploitation rate of the Scaldfish (Arnoglossus laterna Walbaum, 1792) population from the Yumurtalik (Adana) Bight. EUJ Fish. Aquatic Sci 19, 349-358.

Pajuelo, J., Lorenzo, J., Gregoire, M., 2003a. Age and growth of the bastard grunt (Pomadasys incisus: Haemulidae) inhabiting the Canarian archipelago, Northwest Africa. Fishery Bulletin 101, 851-859.

Pajuelo, J.G., Lorenzo, J.M., Domı́nguez-Seoane, R., 2003b. Age estimation and growth of the zebra seabream< i> Diplodus cervinus cervinus</i>(Lowe, 1838) on the Canary Islands shelf (Central-east Atlantic). Fisheries Research 62, 97-103.

Pallaoro, A., Šantić, M., Jardas, I., 2004. Diet composition of young‐of‐the‐year saddled bream, Oblada melanura (Linnaeus, 1758) from the eastern central Adriatic Sea. Journal of Applied Ichthyology 20, 228-230.

Papaconstantinou, C., 1982. On the biology of the Lepidotrigla cavillone (Family Triglidae) of the Greek Seas. Thalassographica 5, 33-59.

Papaconstantinou, C., Caragitsou, E., 1989. Feeding interaction between two sympatric species< i> Pagrus pagrus</i> and< i> Phycis phycis</i> around Kastellorizo Island (Dodecanese, Greece). Fisheries Research 7, 329-342.

Papaconstantinou, C., E., C., V., V., G., P., C., M., A., F., A., T., C-Y., P., M., G., G., D.O., A., S., A., M., A., E., E., P., 1993. Investigation of the abundance and distribution of demersal stocks of primary importance to the Greek fishery in the Northern Aegean Sea (Greece). National Centre for Marine Research, Athens, p. 316.

Papaconstantinou, C., Kapiris, K., 2001. Distribution and population structure of the red shrimp (Aristeus antennatus) on an unexploited fishing ground in the Greek Ionian Sea. Aquatic Living Resources 14, 303-312.

Papaconstantinou, C., Kapiris, K., 2003. The biology of the giant red shrimp (< i> Aristaeomorpha foliacea</i>) at an unexploited fishing ground in the Greek Ionian Sea. Fisheries Research 62, 37-51.

Papaconstantinou, C., Petrakis, G., Mytilineou, C., Politou, C., Vassilopoulou, V., Fourtouni, A., 1989. Fisheries investigations on the demersal fishes of the Euboikos and Pagassitikos Gulfs. National Center for Marine Research, Technical Report.

Pauly, D., 1980. On the interrelationships between natural mortality, growth parameters, and mean environmental temperature in 175 fish stocks. Journal du Conseil 39, 175-192.

Pauly, D., Christensen, V., Sambilay, V., 1990. Some features of fish food consumption estimates used by ecosystem modellers. ICES Counc. Meet 17.

Pauly, D., Froese, R., Albert, J., 1998. The BRAINS table. FishBase 98, 195-198.

Perron, F.E., Turner, R.D., 1978. The feeding behaviour and diet of Calliostoma occidentale, a coelenterate-associated prosobranch gastropod. The Journal of Molluscan Studies 44, 100-103.

Petrakis, G., Stergiou, K., 1995. Weight-length relationships for 33 fish species in Greek waters. Fisheries Research 21, 465-469.

Philips, A.E., 2012. Feeding behavior of the European hake Merluccius merluccius Linnaeus, 1758 (Family: Gadidae) from Egyptian Mediterranean waters off Alexandria. The Egyptian Journal of Aquatic Research 38, 39-44.

Pierce, G.J., Boyle, P.R., Hastie, L.C., Santos, M.B., 1994. Diets of squid Loligo forbesi and Loligo vulgaris in the northeast Atlantic. Fisheries Research 21, 149-163.

Pölzer, W., Patzner, R., 1998. Nahrungsspektrum und Gebibder der Anemonengrundel Gobius bucchichi (Gobiidae) im Mittelmeer. Z. Fischk 5, 83-90.

Quetglas, A., Alemany, F., Carbonell, A., Merella, P., Sánchez, P., 1998. Biology and fishery of< i> Octopus vulgaris</i> Cuvier, 1797, caught by trawlers in Mallorca (Balearic Sea, Western Mediterranean). Fisheries Research 36, 237-249.

Quintela, J., Andrade, J.P., 2002. Diel feeding rhythms, daily ration and gastric evacuation rates of Sepia officinalis in the Ria Formosa lagoon (South Portugal). Bulletin of Marine Science 71, 665-680.

Radhakrishnan, N., 1957. A contribution to the biology of Indian sand whiting Sillago sihama (Forskal). Indian Journal of Fisheries 4, 254-283.

Rafail, S.Z., 1972. A statistical study of length-weight relationship of eight Egyptian fishes. Bull. Inst. Ocean. Fish (Cario) 2, 136-156.

Rafail, S.Z., El-Zarka, S.E.-D., Morovic, D., 1968. Investigations of mullet fisheries by beach seine on the UAR Mediterranean coast. GFCM Secretariat, Food and Agriculture Organization of the United Nations.

Rafail, S.Z., Jukic, S., 1971. Investigations on Sciaenidae and Moronidae catches and on the total catch by beach seine on the UAR Mediterranean coast. GFCM Secretariat, Food and Agriculture Organization of the United Nations.

Rizkalla, S.I., 1997. Age and growth studies of picarels (Spicara flexuosa and Spicara smaris) in the Egyptian Mediterranean waters. Oebalia 23, 75-86.

Rosas-Luis, R., Villanueva, R., Sánchez, P., 2013. Trophic habits of the Ommastrephid squid< i> Illex coindetii</i> and< i> Todarodes sagittatus</i> in the northwestern Mediterranean Sea. Fisheries Research.

Saidi, B., Bradai, M.N., Bouain, A., Capape, C., 2007. Feeding habits of the sandbar shark Carcharhinus plumbeus (Chondrichthyes: Carcharhinidae) from the Gulf of Gabes, Tunisia. Cahiers de biologie marine 48, 139-144.

Saidi, B., Enajjar, S., Bradai, M.N., Bouain, A., 2009. Diet composition of smooth‐hound shark, Mustelus mustelus (Linnaeus, 1758), in the Gulf of Gabès, southern Tunisia. Journal of Applied Ichthyology 25, 113-118.

Sangun, L., Akamca, E., Akar, M., 2007. Weight-length relationships for 39 fish species from the north-eastern Mediterranean coast of Turkey. Turkish Journal of Fisheries and Aquatic Sciences 7, 37-40.

Sangun, L., Tureli, C., Akamca, E., Duysak, O., 2009. Width/Length-Weight and Width-Length Relationships for 8 Crab Species from the North-Eastern Mediterranean Coast of Turkey. Journal of Animal and Veterinary Advances 8, 75-79.

Sardá, R., Pinedo, S., Dueso, A., 2000. Estimating secondary production in natural populations of polychaetes: some general constraints. Bulletin of Marine Science 67, 433-447.

Schintu, P., Passariello, M., Belluscio, A., Ardizzone, G., 1994. Growth and diet of Bothus podas(Pisces: Bothidae) in the Central Mediterranean Sea. Scientia Marina(Barcelona) 58, 359-361.

Serrano, L.G., 2012. Distribution of soft-bottom polychaetes assemblages at different scales in shallow waters of the northern mediterranean Spanish coast. Universitat Politècnica de Catalunya, p. 172.

Sever, T.M., Filiz, H., Bayhan, B., Taskavak, E., Bilge, G., 2008. Food habits of the hollowsnout grenadier, Caelorinchus caelorhincus (Risso, 1810), in the Aegean Sea, Turkey. Belgian Journal of Zoology 138, 81.

Simpfendorfer, C.A., McAuley, R.B., Chidlow, J., Unsworth, P., 2002. Validated age and growth of the dusky shark, Carcharhinus obscurus, from Western Australian waters. Marine and Freshwater Research 53, 567-573.

Siokou-Frangou, I., Bianchi, M., Christaki, U., Christou, E., Giannakourou, A., Gotsis, O., Ignatiades, L., Pagou, K., Pitta, P., Psarra, S., 2002. Carbon flow in the planktonic food web along a gradient of oligotrophy in the Aegean Sea (Mediterranean Sea). Journal of Marine Systems 33, 335-353.

Soykan, O., İLKYAZ, A.T., METİN, G., Kinacigil, H.T., 2013. Growth and reproduction of brown comber (< i> Serranus hepatus</i> Linnaeus, 1758) in the central Aegean Sea, Turkey. Turkish Journal of Zoology 37, 211-217.

Stagioni, M., Montanini, S., Vallisneri, M., 2012. Feeding of tub gurnard Chelidonichthys lucerna (Scorpaeniformes: Triglidae) in the north-east Mediterranean. Journal of the Marine Biological Association of the United Kingdom 92, 605-612.

Stergiou, K., Moutopoulos, D., 2001. A review of length-weight relationships of fishes from Greek marine waters. Naga, The ICLARM Quarterly 24, 23-39.

Taskavak, E., Bilecenoglu, M., 2001. Length–weight relationships for 18 Lessepsian (Red Sea) immigrant fish species from the eastern Mediterranean coast of Turkey. Journal of the Marine Biological Association of the UK 81, 895-896.

Terbiyik Kurt, T., Polat, S., 2013. Seasonal distribution of coastal mesozooplankton community in relation to the environmental factors in İskenderun Bay (north-east Levantine, Mediterranean Sea)—ERRATUM. Journal of the Marine Biological Association of the United Kingdom 93, 1429-1429.

Terrats, A., Petrakis, G., Papaconstantinou, C., 2000. Feeding habits of Aspitrigla cuculus (L., 1758)(red gurnard), Lepidotrigla cavillone (Lac., 1802)(large scale gurnard) and Trigloporus lastoviza (Brunn., 1768)(rock gurnard) around Cyclades and Dodecanese Islands (E. Mediterranean). Mediterranean Marine Science 1, 91-104.

Tomas, J., Aznar, F., Raga, J., 2001. Feeding ecology of the loggerhead turtle Caretta caretta in the western Mediterranean. Journal of Zoology 255, 525-532.

Torres, M., Ramos, F., Sobrino, I., 2012. Length–weight relationships of 76 fish species from the Gulf of Cadiz (SW Spain). Fisheries Research 127, 171-175.

Tosunoglu, Z., O., A., G., M., A., T., S., U., 1997. The study on the population characteristics of three sparid species in the Gulbah bay. Su Urunleri Dergisi 14, 127-143.

Tsimenidis, N., 1980. Contribution to the study of the angler-fishes Lophius budegassa Spinola, 1807 and L. piscatorius L., 1758 in Greek seas. University of Patras, p. 190.

Tsimenidis, N.C., Ondrias, J.C., 1980. Growth studies on the angler-fishes Lophius piscatorius L., 1758 and Lophius budegassa Spinola, 1807 in Greek waters. Thalassographica 3, 63-94.

Türker Çakir, D., Bayhan, B., Hossucu, B., 2005. Some Parameters of the Population Biology of Spotted Flounder (Citharus linguatula Linnaeus, 1758) in Edremit Bay (North Aegean Sea). Turk. J. Vet. Anim. Sci 29, 1013-1018.

Turkmen, M., 2003. Investigation of some population parameters of common sole, Solea solea (L., 1758) from Iskenderun Bay. Turkish Journal of Veterinary and Animal Sciences 27, 317-324.

Türkmen, M., Akyurt, I., 2003. Growth Characteristics, Sex Inversion and Mortality Rates of Striped Sea Bream, Lithognathus mormyrus L., in İskenderun Bay. Turkish Journal of Zoology 27, 323-329.

Zervoudaki, S., Christou, E., Assimakopoulou, G., Örek, H., Gucu, A., Giannakourou, A., Pitta, P., Terbiyik, T., Yϋcel, N., Moutsopoulos, T., 2011. Copepod communities, production and grazing in the Turkish Straits System and the adjacent northern Aegean Sea during spring. Journal of Marine Systems 86, 45-56.
